# Supplementary material for: Ceramide kinase regulates acute wound healing by suppressing 5-oxo-ETE biosynthesis and signaling via its receptor OXER1
Source: PubMed Central journal article supplement (PMC8980959; doi:10.1016/j.jlr.2022.100187), 2022-02-24
Supplement: mmc1.pdf [file mmc1.pdf]

**SUPPLEMENTAL INFORMATION:**

**Ceramide kinase regulates acute wound healing by suppressing 5-oxo-ETE biosynthesis and signaling via its receptor OXER1.**

Kenneth D. Maus<sup>1</sup>, Daniel J. Stephenson<sup>1</sup>, Anika N. Ali<sup>1</sup>, H. Patrick MacKnight<sup>1</sup>, Huey-Jing Huang<sup>2</sup>, Jordi Serrats<sup>2</sup>,  
Minjung Kim<sup>1</sup>, Robert F. Diegelmann<sup>3</sup>, and Charles E. Chalfant<sup>1,4-9</sup>

<sup>1</sup>Department of Cell Biology, Microbiology, and Molecular Biology, University of South Florida, Tampa, FL 33620

<sup>2</sup>Neuroscience Drug Discovery Unit, Takeda California, San Diego, CA, USA (J.S.), Present address: Engrail Therapeutics, San Diego, CA, USA (JS), Present address: ADARx Pharmaceuticals, San Diego, CA 92121 (H-JH)

<sup>3</sup>Department of Biochemistry and Molecular Biology, Virginia Commonwealth University-School of Medicine, Richmond, VA 23298-0614

<sup>4</sup>Cancer Biology and Evolution Program, The Moffitt Cancer Center, Tampa, FL 33620

<sup>5</sup>Research Service, James A. Haley Veterans Hospital, Tampa, FL 33612

<sup>6</sup>Department of Medicine, Division of Hematology & Oncology, University of Virginia, Charlottesville, VA, 22903

<sup>7</sup>Department of Cell Biology, University of Virginia, Charlottesville, VA, 22903

<sup>8</sup>Program in Cancer Biology, University of Virginia Cancer Center, Charlottesville, VA, 22903

<sup>9</sup>Research Service, Hunter Holmes McGuire Veterans Administration Medical Center, Richmond VA, 23298

## Supplemental Material

**Table S1. SYR382141 compound *in vitro* and intracellular cytotoxicity studies.** Recombinant human and mouse ceramide kinase were assayed in the presence and absence of various concentrations of SYR382141 as previously described by others<sup>72-74</sup> using the ADP-Glo™ Kinase Assay (Promega Corporation). The closely related lipid kinases, sphingosine kinase 1 and 2 (SPHK1, SPHK2), phosphatidylinositol 4-kinase beta (PIK4B), phosphatidylinositol-4-phosphate 3-kinase catalytic subunit type 2 alpha (PI3KC2A), and phosphatidylinositol 3-kinase catalytic subunit type 3 (PIK3C3), were also analyzed in the presence and absence of various concentrations of SYR382141 also using the ADP-Glo™ Kinase Assay (Promega Corporation). The effect of SYR382141 on a Global kinase panel<sup>75</sup> was also assessed. Lastly, cytotoxicity of SYR382141 was assessed in HepG2 cells via MTT assay as previously described<sup>76-80</sup>. Data are courtesy of Takeda Corporation.

|                                                           |           |
|-----------------------------------------------------------|-----------|
| Compound                                                  | SYR382141 |
| Hm Enz IC <sub>50</sub> (nM)                              | 5         |
| Ms Enz IC <sub>50</sub> (nM)                              | 9         |
| SPHK1/SPHK2/PI4KB/PI3KC2A/PIK3C3<br>IC <sub>50</sub> (μM) | >100      |
| Global Kinase panel ≤ 1 μM                                | Negative  |
| Cytotox 72h IC <sub>50</sub> (μM)                         | 30.3      |

**Table S2. Pharmacokinetics of SYR382141 in mice.** The concentration of SYR38214 was analyzed in the plasma of mice retention in mouse plasma over the indicated time using UPLC-ESI-MS/MS following oral gavage of the compound at the indicated concentration. Data are courtesy of Takeda Corporation.

| <b>SYR382141 (15 mg/kg)</b>              |                   |                   |                   |
|------------------------------------------|-------------------|-------------------|-------------------|
| Time (hr)                                | Mean Plasma Conc. | Mean Plasma Conc. | Mean Plasma Conc. |
|                                          | (ng/mL) Total     | (nM) Total        | (nM) Free         |
| 0.5                                      | 5114              | 12247             | 73                |
| 1                                        | 4771              | 11426             | 69                |
| 4                                        | 586               | 1403              | 8                 |
| <b><math>f_{u,plasma} = 0.006</math></b> |                   |                   |                   |

**Table S3. Retention of SYR382141 in kidney.** SYR382141 compound present in mouse kidney tissue after 10 days PO

b.i.d.

|               | Untreated          |   |       | Sham               |   |       | 60 mg/kg           |   |        |
|---------------|--------------------|---|-------|--------------------|---|-------|--------------------|---|--------|
|               | SYR382141<br>conc. |   | SD    | SYR382141<br>conc. |   | SD    | SYR382141<br>conc. |   | SD     |
| Kidney (ng/g) | 0.000              | ± | 0.000 | 0.000              | ± | 0.000 | 38.780             | ± | 12.968 |

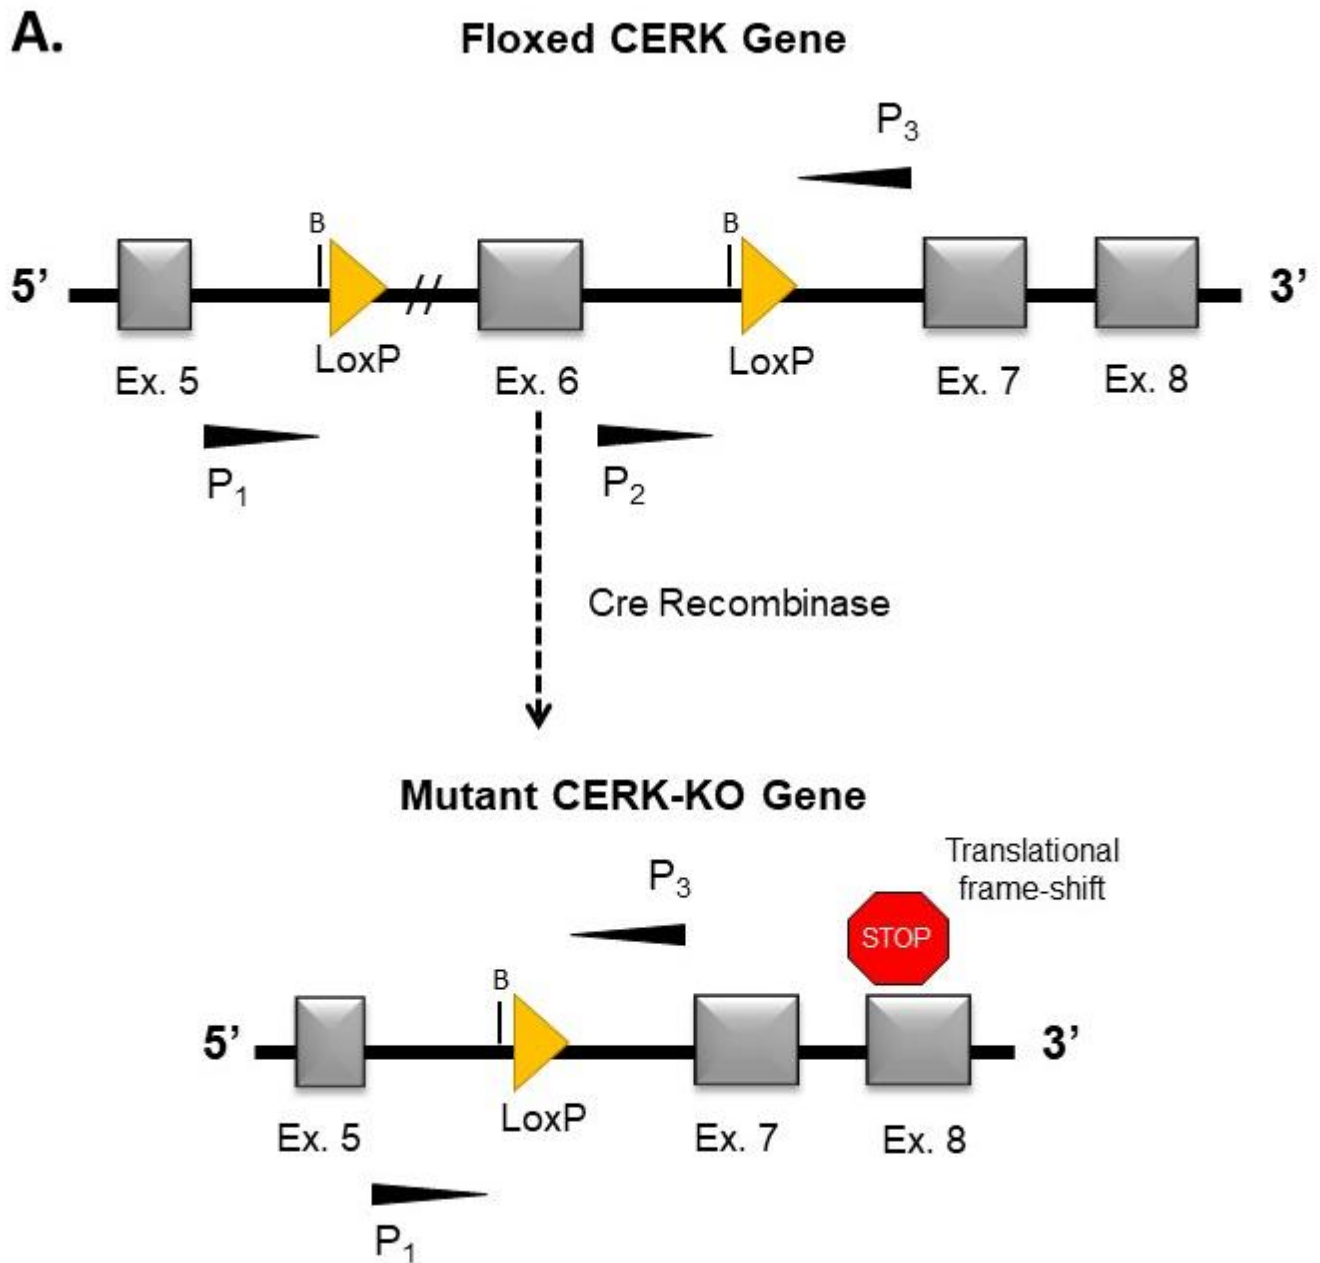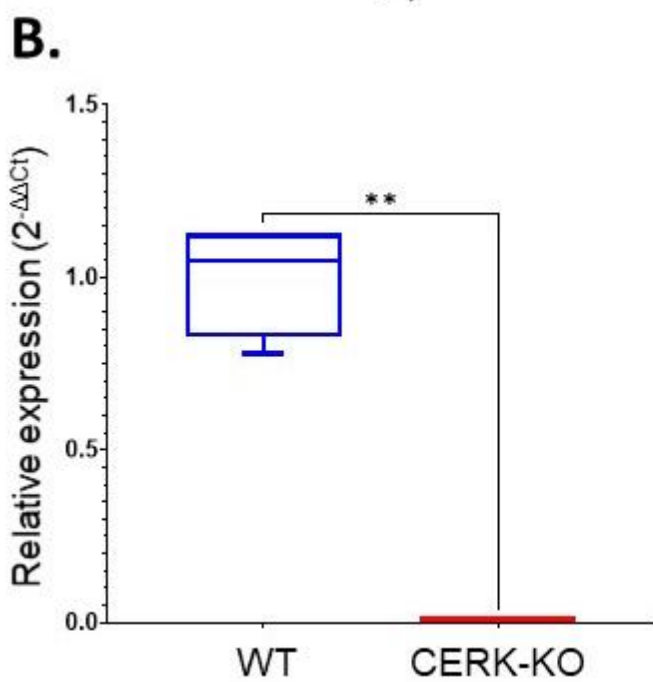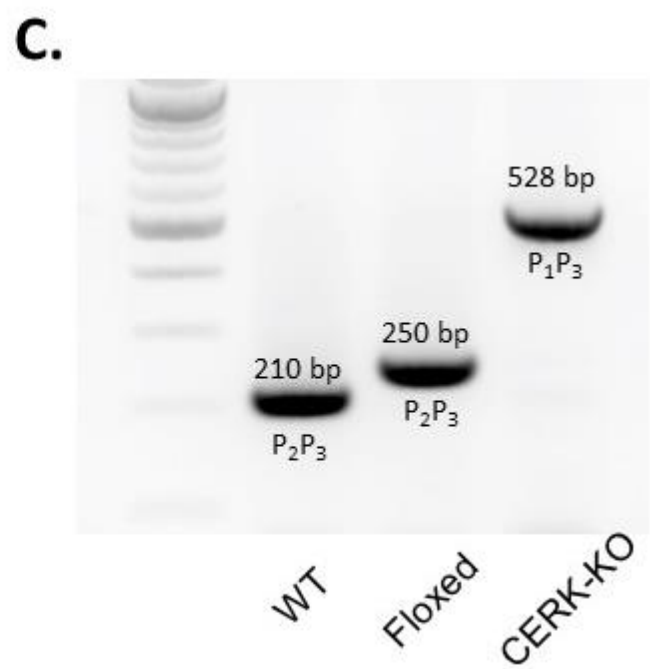

**Figure S1. Strategy and design of the novel *CERK* KO mice.** (A) A schematic representation of the inserted flanked loxP sites (“Floxed”) and their associated BamH I sites at the beginning of endogenous introns 5 and 6 used to generate the *CERK* knockout (*CERK*-KO) mice used in this study. Mice possessing a floxed *CERK* allele were bred to mice expressing Cre recombinase in the germline (EIIa-*cre* homozygotes, JAX stock #003724). Offspring were screened for the KO allele and confirmed by DNA sequencing. Cre-mediated deletion of *CERK* exon 6 (encoding amino acids 191-238) results in a translational frame-shift with termination in exon 8. Mice carrying the KO allele were subsequently bred to C57BL/6J mice, and Cre-negative offspring were selected to establish the *CERK* -KO line. (B) RNA from WT and *CERK* -KO primary dermal fibroblasts was converted to cDNA and used for quantitative PCR analysis using primers specific to the mouse *CERK* gene. Samples were compared using paired t-test (n=4, \*\*p < 0.01). (C) Genotypic analysis of WT, Floxed, and *CERK*-KO alleles was performed using genomic DNA, analyzed via end point multiplex PCR using the following primers: Intron 5 forward primer: 5'-CTGAGATGGCCGTTTCTCACAGAG-3' (P1), intron 6 forward primer: 5'-ATGCTCACTAGAGACCCAGTCCTC-3' (P2), and intron 6 reverse primer: 5'-TTCACCAGGCTTTGGACACAGCAC-3' (p3) and examined via gel electrophoresis. When using the cassette specific primer sets, three bands are possible, WT – 210 bp (p<sub>2</sub>-p<sub>3</sub>), Floxed – 250 bp (p<sub>2</sub>-p<sub>3</sub> containing LoxP and BamH I sites), and *CERK*-KO – 528 bp (p<sub>1</sub>-p<sub>3</sub> without exon 6).

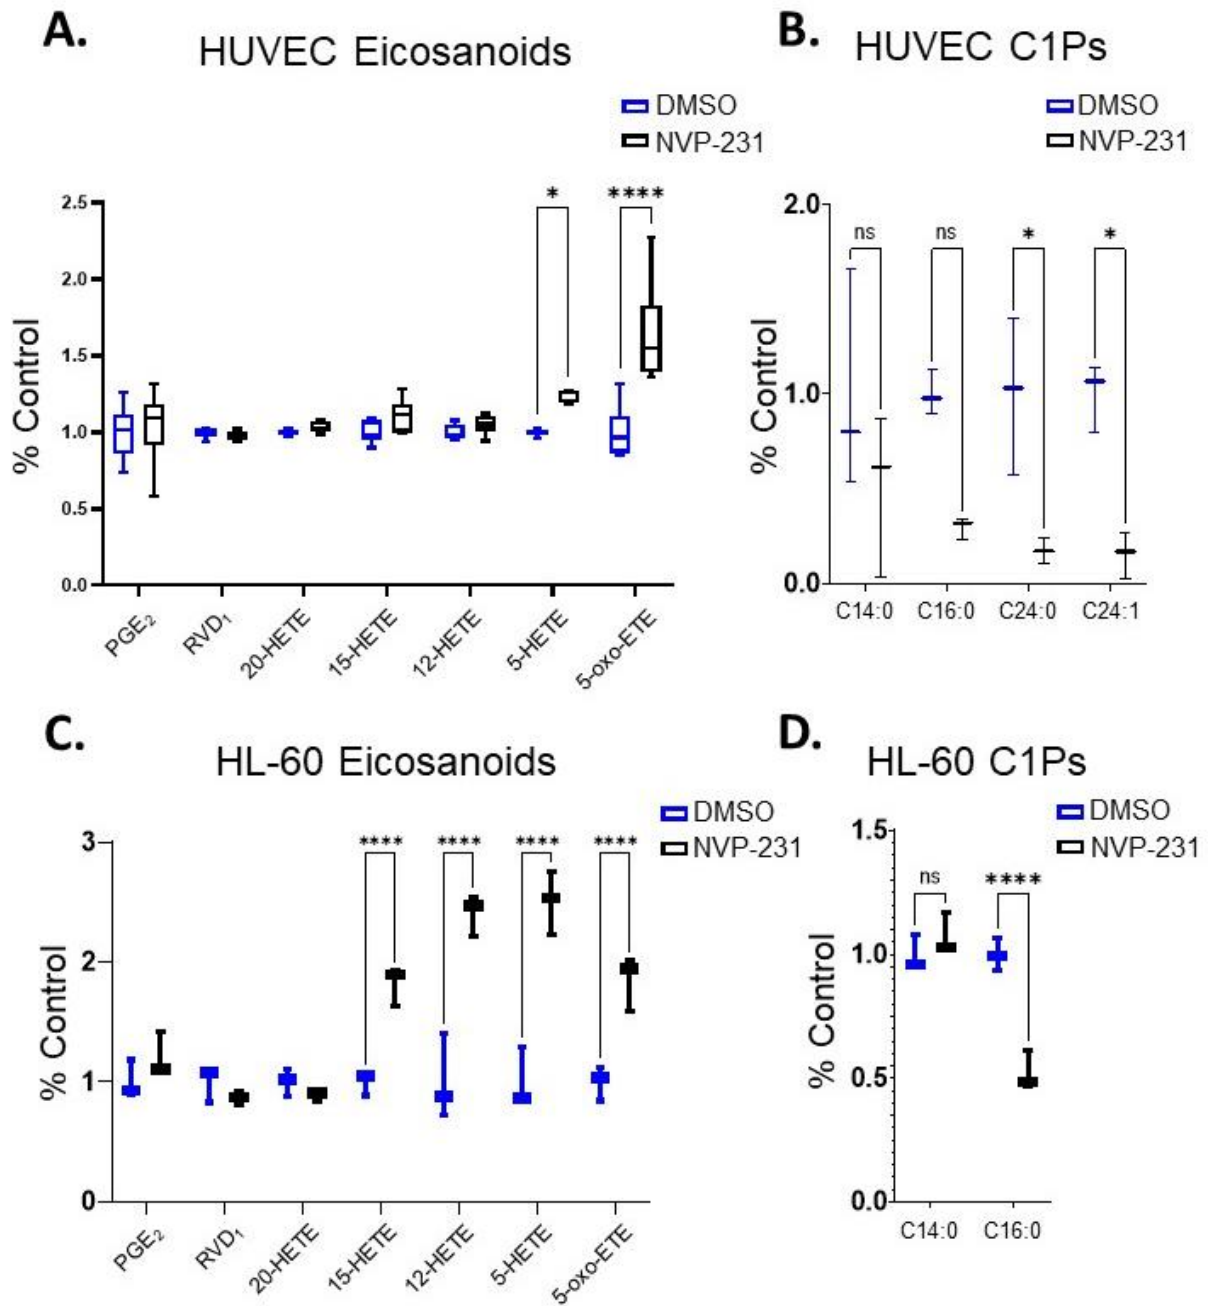

**Figure S2. Eicosanoid profile of HUVEC and HL-60 cells.** (A) Graphical analysis of eicosanoids (n=6) and (B) C1P species (n=3) from HUVECs pre-treated with NVP-231 (300 nM) or DMSO (0.001%) control for 24 hours. (C) Graph depicting eicosanoid (n=3) and (D) C1P species from HL-60 cells (n=3) treated with NVP-231 for 24 hours (Two-way ANOVA with Šídák's multiple comparisons test; \*p < 0.05, \*\*\*\*p < 0.0001).

## A. Eicosanoid FC over time

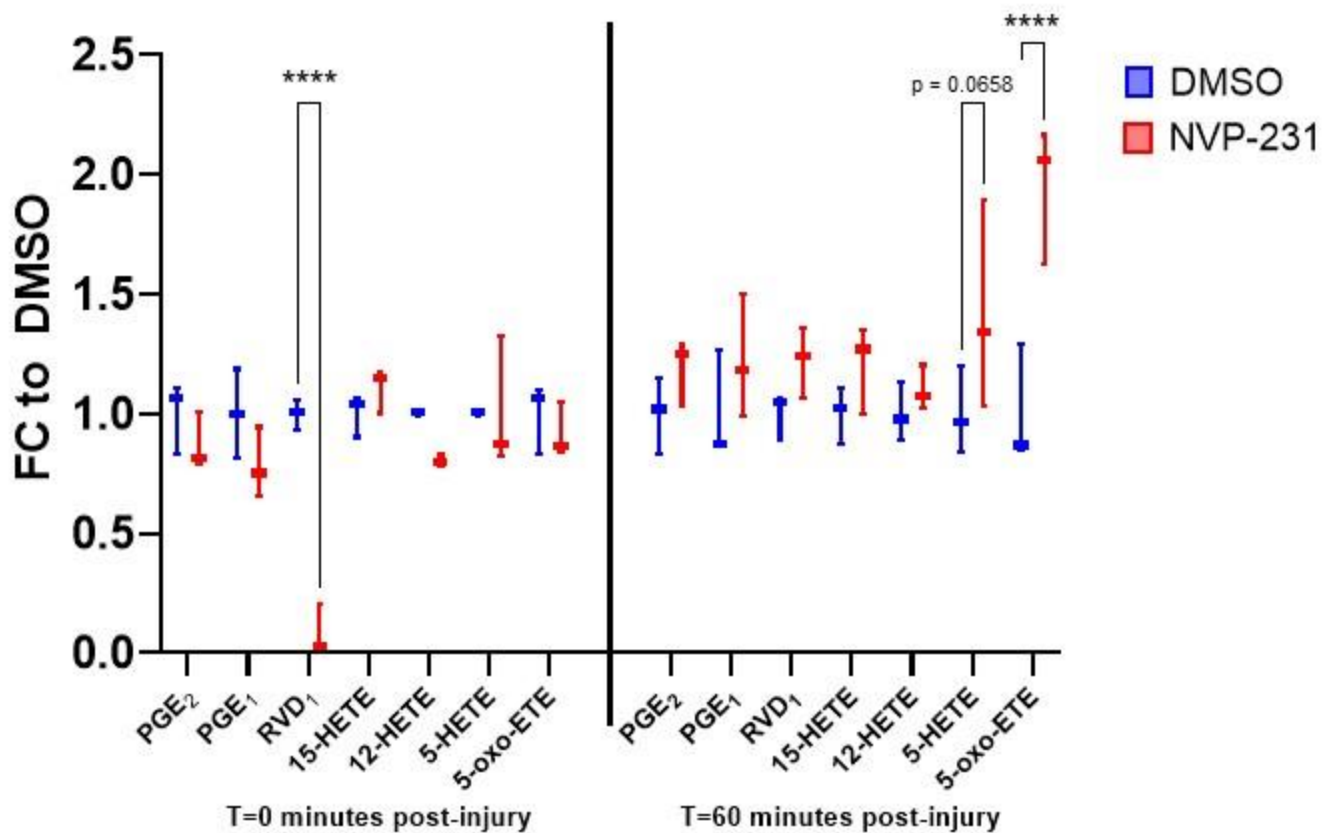

## B. Ceramide FC over time

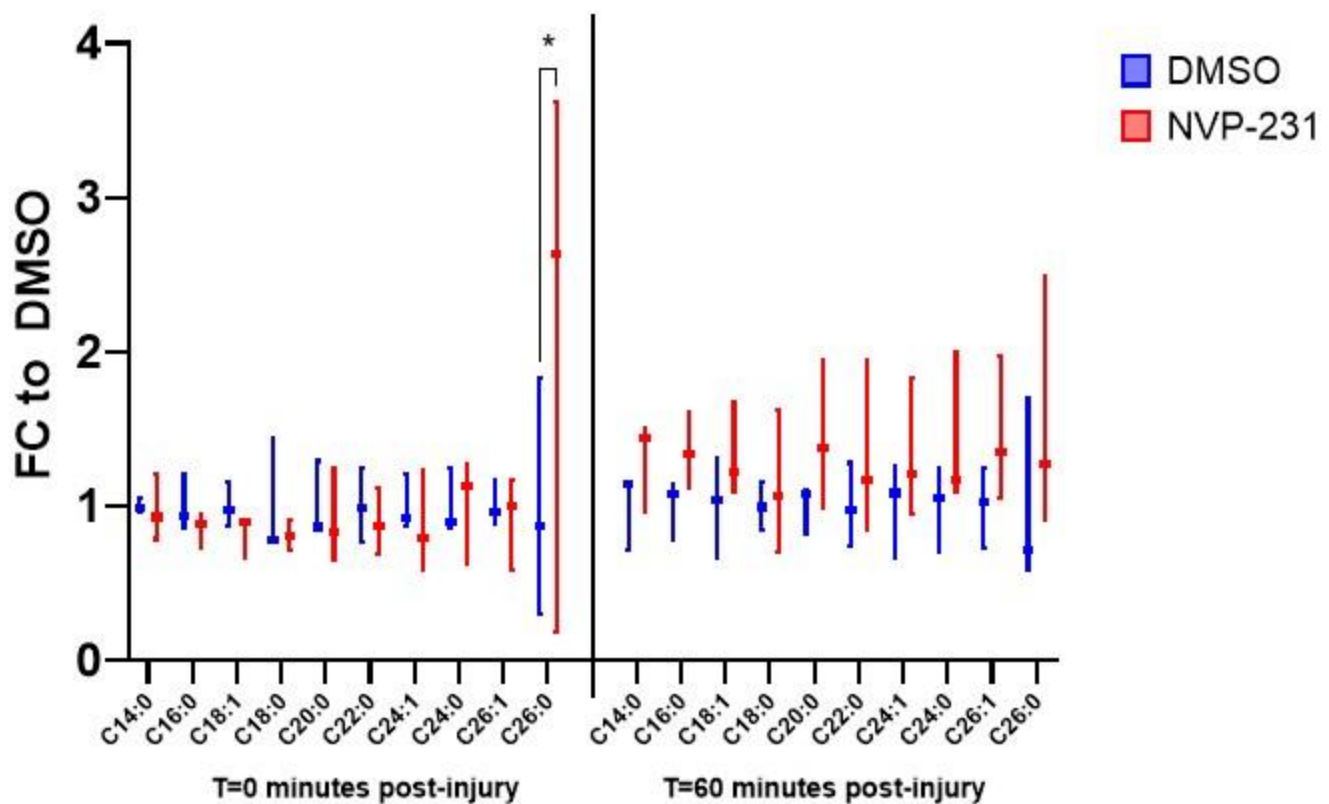



**Figure S3. Scratch assay lipid changes over time.** (A) Eicosanoid changes for wild-type pDF scratch assay at times 0- and 60-minutes post-injury (n=3). (B) Ceramide changes for wild-type pDF scratch assay at time 0- and 60-minutes post-injury (n=3). Wild-type pDFs were pre-treated with DMSO (0.01%) or NVP-231 (100 nM) for 30 minutes received mechanical trauma via asterisk pattern scratch across the plate. Cells were collected immediately (T=0) or 60-minutes (T=60) post-injury and analyzed for eicosanoid and ceramide levels via UPLC ESI-MS/MS. Values expressed as fold change to DMSO controls (\*p < 0.05, \*\*\*\*p < 0.0001; n=3, pDFs collected from 3 different mice. Two-way ANOVA with Šídák's multiple comparisons test).
